# Supplementary material for: Kinetics of propane dehydrogenation over Pt–Sn/Al2O3
Source: Royal Society of Chemistry journal article supplement (doi:10.1039/c2cy20488f), 2012-12-21
Supplement: c2cy20488f_2.pdf [file c2cy20488f_2.pdf]

## APPENDIX B

Perego and Peratello described the importance of thermodynamics in that the heat of reaction and maximum conversion determine the limits of the system.<sup>[1]</sup> We have accordingly analysed the thermodynamics of our case drawing on reference data for propane, propylene and hydrogen as a function of temperature.<sup>[2]</sup> The specific enthalpy ( $\Delta\bar{H}$ ) as is given in eqn. (B1). The dehydrogenation of propane is strongly endothermic ( $\approx 129 \text{ kJ mol}^{-1}$ ) within 723 and 823 K.

$$\Delta\bar{H} = (6.97 \times 10^{-9}) \times T^3 + (-2.69 \times 10^{-5}) \times T^2 + (3.25 \times 10^{-2}) \times T + 116.78 \quad (\text{B1})$$

Similarly, the specific Gibbs free energy ( $\Delta\bar{G}$ ,  $\text{kJ mol}^{-1}$ ) and equilibrium constant ( $K_p$ , atm) are given in eqns. (B2) and (B3),

$$\Delta\bar{G} = (-0.137) \times T + 128.102 \quad (\text{B2})$$

$$K_p = (1.48 \times 10^7) \times \exp(-15403/T) \quad (\text{B3})$$

The equilibrium conversion was finally calculated using eqn. (B4)

$$\text{Equilibrium Conversion} = \sqrt{1/(1 + P/K_p)} \quad (\text{B4})$$

Figure B1 presents the results. The maximum achievable fractional conversion in the temperature range studied ( $723 \text{ K} \leq T \leq 823 \text{ K}$ ) lies between 0.09 and 0.32. These results are consistent with the works of Michorczyk *et al.*<sup>[3,4]</sup> and Assabumrungrat and co-workers.<sup>[5]</sup> Moreover, Weckhuysen and Schoonheydt reported that temperatures as high as 870 K are needed to achieve a 50% conversion.<sup>[6]</sup> Additionally, we studied the effect of the presence of propene and hydrogen (*i.e.* the reaction products, eqn. (B5)) in the composition of the inlet by using

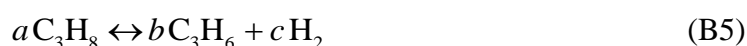

where  $a$ ,  $b$  and  $c$  are the stoichiometric coefficients and the equilibrium fractional conversion is now calculated from eqns. (B6) and (B7).

$$\left[\left(P/K_p\right)+1\right] \times s^2 + \left[\left(P/K_p\right) \times (b+c) - (a-d)\right] \times s + \left[\left(P/K_p\right) \times (b \times c) - a \times d\right] = 0 \quad (\text{B6})$$

$$\text{Equilibrium Conversion} = \frac{a-s}{a} \quad (\text{B7})$$

Figure B2 shows the change in propane conversion with the propylene-to-propane ( $b/a$ ) and hydrogen-to-propane ( $c/a$ ) molar ratios. A unique surface is determined for each reaction temperature. At 700 K, the presence of propylene or hydrogen with propane decreases conversion, which falls to zero whenever  $b/a$  and  $c/a > 1$ . An increase in

temperature (to 900 K) favours dehydrogenation where ratios  $b/a$  or  $c/a > 10$  are needed to significantly decrease conversion at 900 K. This is an important outcome since in a typical industrial dehydrogenation operational mode, hydrogen is normally co-fed with propane as a means to suppress coke formation.<sup>[7]</sup> The simultaneous presence of propylene and hydrogen have dramatic consequences where no conversion is observed whenever  $b/a$  and  $c/a > 5$ . Our results demonstrate the great impact of the presence of reaction products in the inlet stream, and the importance of this analysis for this reaction.

## References:

- [1] C. Perego, S. Peratello, *Catal. Today* **1999**, 52, 133.
- [2] D. R. Stull, E. F. Westburn., G. C. Sinke, *The Chemical Thermodynamics of Organic Compounds*, John Wiley & Sons, Inc., New York, **1969**.
- [3] P. Michorczyk, J. Ogonowski, *React. Kinet. Catal. Lett.* **2003**, 78, 41.
- [4] P. Michorczyk, J. Ogonowski, *Appl. Catal. A: General* **2003**, 251, 425.
- [5] S. Assabumrungrat, W. Jhoraleecharnchai., P. Prasertthdam, S. Goto, *J. Chem. Eng. Jpn.* **2000**, 33, 529.
- [6] B. M. Weckhuysen, R. A. Schoonheydt, *Catal. Today* **1999**, 51, 223.
- [7] M. S. Voronetskii, L. P. Didenko, V. I. Savchenko, *Russ. J. Phys. Chem. B* **2009**, 3, 216.

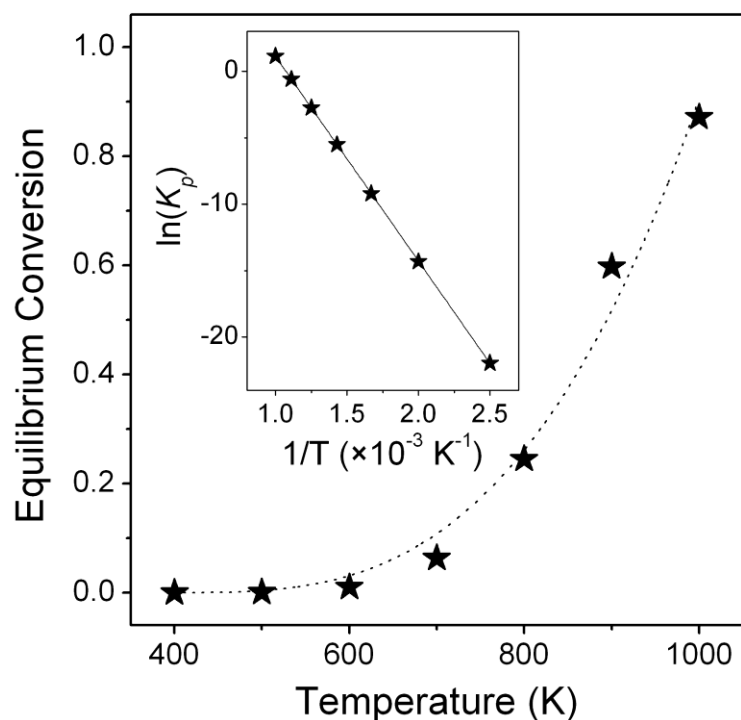

**Figure B1:** Propane dehydrogenation equilibrium conversion and constant ( $K_p$ , inset) as a function of temperature (see eqns. (B.3) and (B.4)).

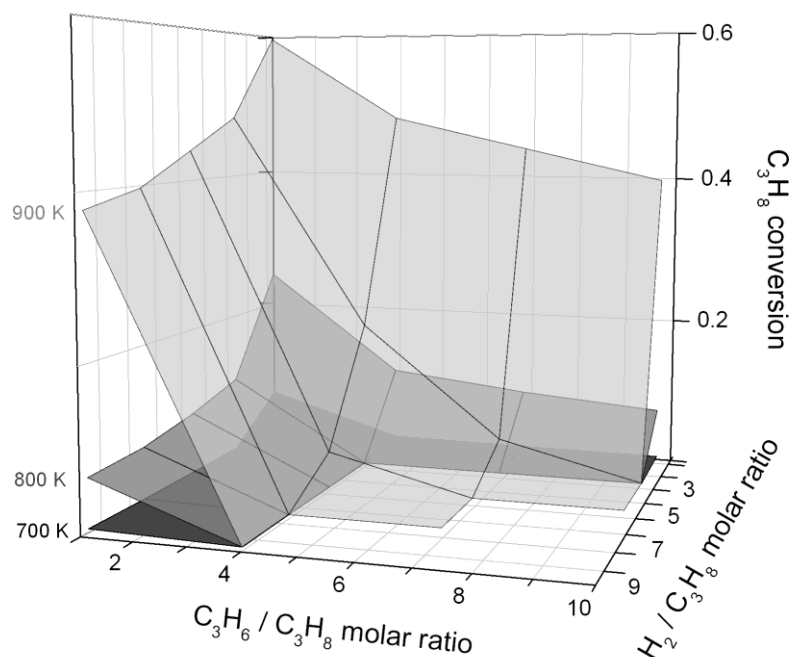

**Figure B2:** Propane dehydrogenation equilibrium conversion (Z-Axis) as a function of the ratios propylene/propane (X-Axis, left-to-right) and hydrogen/propane (Y-Axis, front-to-back). Each surface represents data calculated at different temperatures (see eqns. (B.6) and (B.7)).
